# Supplementary material for: Network Meta-analysis Comparing Efficacy, Safety and Tolerability of Anti-PD-1/PD-L1 Antibodies in Solid Cancers
Source: PubMed Central journal article supplement (PMC8176414; doi:10.7150/jca.57413), 2021-05-19
Supplement: jcav12p4372s1.pdf [file jcav12p4372s1.pdf]

Supplementary appendix

| Study name                                      | CheckMate-026   |              |                    |              |
|-------------------------------------------------|-----------------|--------------|--------------------|--------------|
|                                                 | Nivolumab (267) |              | Chemotherapy (263) |              |
| Events/Grade                                    | Any grade       | grade 3 or 4 | Any grade          | grade 3 or 4 |
| Any event                                       | 190 (71%)       | 47 (18%)     | 243 (92%)          | 133 (51%)    |
| Any serious event                               | 46 (17%)        | 35 (13%)     | 48 (18%)           | 41 (16%)     |
| Any event leading to discontinuation of therapy | 26 (10%)        | 21 (8%)      | 35 (13%)           | 17 (6%)      |

| Study name                                      | Keynote-024         |              |                    |              |
|-------------------------------------------------|---------------------|--------------|--------------------|--------------|
|                                                 | Pembrolizumab (154) |              | Chemotherapy (150) |              |
| Events/Grade                                    | Any grade           | Grade 3 or 4 | Any grade          | Grade 3 or 4 |
| Any event                                       | 113 (73.4%)         | 41 (26.6%)   | 135 (90%)          | 80 (53.3%)   |
| Any serious event                               | 33 (21.4%)          | 29 (18.8%)   | 31 (20.7%)         | 29 (19.3%)   |
| Any event leading to discontinuation of therapy | 11 (7.1%)           | 8 (5.2%)     | 16 (10.7%)         | 9 (6%)       |
| Led to death                                    | 1 (0.6%)            | 1 (0.6%)     | 3 (2%)             | 3 (2%)       |

| Study name                                      | Keynote-042         |              |                    |              |
|-------------------------------------------------|---------------------|--------------|--------------------|--------------|
|                                                 | Pembrolizumab (636) |              | Chemotherapy (615) |              |
| Events/Grade                                    | Any grade           | Grade 3 or 4 | Any grade          | Grade 3 or 4 |
| Any event                                       | 399 (63%)           | 113 (18%)    | 553 (90%)          | 252 (41%)    |
| Any event leading to discontinuation of therapy | 57 (9%)             | 48 (8%)      | 58 (9%)            | 43 (7%)      |
| Led to death                                    | 13 (2%)             | 13 (2%)      | 14 (2%)            | 14 (2%)      |

| Study name                                      | Impower-110        |                    |
|-------------------------------------------------|--------------------|--------------------|
|                                                 | Atezolizumab (286) | Chemotherapy (263) |
| Events/Grade                                    | Grade 3 or 4       | grade 3 or 4       |
| Any event                                       | 37 (12.9%)         | 116 (44.1%)        |
| Any event leading to discontinuation of therapy | 18(6.3%)           | 43 (16.3%)         |
| Led to death                                    | 11 (3.8)           | 11 (4.2%)          |

| Study name                                      | CheckMate-057   |              |                 |              |
|-------------------------------------------------|-----------------|--------------|-----------------|--------------|
|                                                 | Nivolumab (287) |              | Docetaxel (268) |              |
| Events/Grade                                    | Any grade       | grade 3 or 4 | Any grade       | grade 3 or 4 |
| Any event                                       | 280 (98%)       | 132 (46%)    | 265 (99%)       | 180 (67%)    |
| Any serious event                               | 21 (7%)         | 15 (5%)      | 53 (20%)        | 48 (18%)     |
| Any event leading to discontinuation of therapy | 14 (5%)         | 11 (4%)      | 40 (15%)        | 18 (7%)      |
| Led to death                                    | 1 (0.3%)        |              | 0               |              |

Supplementary appendix

| Study name                                      | CheckMate-017   |              |                 |              |
|-------------------------------------------------|-----------------|--------------|-----------------|--------------|
|                                                 | Nivolumab (131) |              | Docetaxel (129) |              |
| Events/Grade                                    | Any grade       | grade 3 or 4 | Any grade       | grade 3 or 4 |
| Any event                                       | 76 (58%)        | 9 (7%)       | 111 (86%)       | 71 (55%)     |
| Any serious event                               | 9 (7%)          | 3 (2%)       | 31 (24%)        | 25 (19%)     |
| Any event leading to discontinuation of therapy | 4 (3%)          | 2 (2%)       | 13 (10%)        | 8 (6%)       |
| Led to death                                    | 0               |              | 3 (2.3%)        |              |

| Study name   | Keynote-010         |              |                 |              |
|--------------|---------------------|--------------|-----------------|--------------|
|              | Pembrolizumab (339) |              | Docetaxel (309) |              |
| Events/Grade | Any grade           | Grade 3 or 4 | Any grade       | Grade 3 or 4 |
| Any event    | 215 (63%)           | 43 (13%)     | 251 (81%)       | 109 (35%)    |

| Study name                                      | OAK trial          |              |                 |              |
|-------------------------------------------------|--------------------|--------------|-----------------|--------------|
|                                                 | Atezolizumab (609) |              | Docetaxel (578) |              |
| Events/Grade                                    | Any grade          | Grade 3 or 4 | Any grade       | Grade 3 or 4 |
| Any event                                       | 573 (94%)          | 227 (37%)    | 555 (96%)       | 310 (54%)    |
| Any serious event                               | 194 (32%)          | N/A          | 181 (31%)       | N/A          |
| Any event leading to discontinuation of therapy | 46 (8%)            | 46 (8%)      | 108 (19%)       | 108 (19%)    |
| Led to death                                    | 10 (2%)            | 10 (2%)      | 14 (2%)         | 14 (2%)      |

| Study name                                      | POPLAR trial       |              |                 |              |
|-------------------------------------------------|--------------------|--------------|-----------------|--------------|
|                                                 | Atezolizumab (142) |              | Docetaxel (135) |              |
| Events/Grade                                    | Any grade          | grade 3 or 4 | Any grade       | grade 3 or 4 |
| Any event                                       | 136 (96%)          | 63 (44%)     | 130 (96%)       | 76 (56%)     |
| Any serious event                               | 50 (35%)           |              | 46 (34%)        |              |
| Any event leading to discontinuation of therapy | 11 (8%)            |              | 30 (22%)        |              |
| Led to death                                    | 6 (4.2%)           |              | 5 (3.7%)        |              |

| Study name   | Javelin Lung 200 |                |                 |                |
|--------------|------------------|----------------|-----------------|----------------|
|              | Avelumab (393)   |                | Docetaxel (365) |                |
| Events/Grade | Any grade        | grade 3,4 or 5 | Any grade       | grade 3,4 or 5 |
| Any event    | 251 (64%)        | 39 (10%)       | 313 (86%)       | 180 (49%)      |

| Study name   | Keynote-006         |                |                  |                |
|--------------|---------------------|----------------|------------------|----------------|
|              | Pembrolizumab (278) |                | Ipilimumab (256) |                |
| Events/Grade | Any grade           | Grade 3,4 or 5 | Any grade        | Grade 3,4 or 5 |
| Any event    | 202 (72.9%)         | 28 (10.1%)     | 187 (73%)        | 51 (19.9%)     |

Supplementary appendix

| Study name                                      | CheckMate-067   |              |                  |             |
|-------------------------------------------------|-----------------|--------------|------------------|-------------|
|                                                 | Nivolumab (313) |              | Ipilimumab (311) |             |
| Events/Grade                                    | Any grade       | Grade 3 or 4 | Any grade        | Grade3 or 4 |
| Any event                                       | 270 (86%)       | 67 (21%)     | 268 (86%)        | 86 (28%)    |
| Any event leading to discontinuation of therapy | 37 (12%)        | 24 (8%)      | 49 (16%)         | 43 (14%)    |

| Study name   | Keynote-048         |              |                                                      |              |
|--------------|---------------------|--------------|------------------------------------------------------|--------------|
|              | Pembrolizumab (300) |              | Chemotherapy (287)<br>(cetuximab, platinum and 5-FU) |              |
| Events/Grade | Any grade           | Grade 3 or 4 | Any grade                                            | Grade 3 or 4 |
| Any event    | N/A                 | 164 (54%)    | N/A                                                  | 239 (83%)    |
| Led to death | 3 (1%)              |              | 8 (2.8%)                                             |              |

| Study name   | CheckMate-141   |              |                                               |              |
|--------------|-----------------|--------------|-----------------------------------------------|--------------|
|              | Nivolumab (236) |              | Standard Rx (111) MTX, docetaxel or cetuximab |              |
| Events/Grade | Any grade       | Grade 3 or 4 | Any grade                                     | grade 3 or 4 |
| Any event    | 139 (58.9%)     | 31 (13.1%)   | 89 (80%)                                      | 39 (35%)     |

| Study name                                      | Keynote-045         |              |                                                           |              |
|-------------------------------------------------|---------------------|--------------|-----------------------------------------------------------|--------------|
|                                                 | Pembrolizumab (266) |              | Chemotherapy (255)<br>docetaxel, paclitaxel or vinflunine |              |
| Events/Grade                                    | Any grade           | Grade 3 or 4 | Any grade                                                 | Grade 3 or 4 |
| Any event                                       | 162 (60.9%)         | 40 (15%)     | 230 (90.2%)                                               | 126 (49%)    |
| Any event leading to discontinuation of therapy | 15 (5.6 %)          | 12 (4.5%)    | 28 (11%)                                                  | 16 (6.3%)    |
| Led to death                                    | 4 (1.5%)            | 4 (1.5%)     | 4 (1.6%)                                                  | 4 (1.6%)     |

| Study name   | Imvigor-211        |                                                           |
|--------------|--------------------|-----------------------------------------------------------|
|              | Atezolizumab (459) | Chemotherapy (443)<br>docetaxel, paclitaxel or vinflunine |
| Events/Grade | Any grade          | Any grade                                                 |
| Any event    | 319 (69%)          | 395 (89%)                                                 |
